# Supplementary material
Source: Elsevier journal article supplement (https://www.sciencedirect.com/science/article/pii/S0213911120301382)
Supplement: mmc1 [file S0213911120301382:mmc1.docx]

**Apéndice**

**Trabajos revisados sobre la reciente crisis económica y la salud mental en España**

A1. Urbanos-Garrido RM, López-Valcárcel BG. The influence of the economic crisis on the association between unemployment and health: an empirical analysis for Spain. Eur J Health Econ. 2015;16:175-8.

A2. Urbanos R, González B. Sanidad y desigualdad. En: Segundo Informe sobre Desigualdad en España. Madrid: Fundación Alternativas; 2015. p. 155-91.

A3. Tamayo-Fonseca N, Nolasco A, Moncho J, et al. Contribution of the economic crisis to the risk increase of poor mental health in a region of Spain. Int J Environ Res Public Health. 2018;15:2517.

A4. Basterra V. Evolución de la prevalencia de alto riesgo de trastornos mentales en población adulta española: 2006-2012. Gac Sanit. 2017;31:324-6.

A5. Gili M, Roca M, Basu S, et al. The mental health risks of economic crisis in Spain: evidence from primary care centres, 2006 and 2010. Eur J Public Health. 2013;23:103-8.

A6. Bartoll X, Palència L, Malmusi D, et al. The evolution of mental health in Spain during the economic crisis. Eur J Public Health. 2014;24:415-8.

A7. Bacigalupe A, Esnaola S, Martín U. The impact of the Great Recession on mental health and its inequalities: the case of a Southern European region, 1997-2013. Int J Equity Health. 2016;26:5-17.

A8. Utzet M, Navarro A, Llorens C, et al. Is the worsening of psychosocial exposures associated with mental health? Comparing two population-based cross-sectional studies in Spain, 2005-2010. Am J Ind Med. 2016;59:399-407.

A9. Bartoll X, Gil J, Ramos R. Has the economic crisis worsened the work-related stress and mental health of temporary workers in Spain? Documento de trabajo 2018/08 IREA; 2018.

A10. Gili M, López-Navarro E, Castro A, et al. Gender differences in mental health during the economic crisis. Psicothema. 2016;28:407-13.

A11. Cortès-Franch I, Escribà-Agüir V, Benach J, et al. Employment stability and mental health in Spain: towards understanding the influence of gender and partner/marital status. BMC Public Health. 2018;18:425.

A12. Vásquez-Vera H, Rodríguez-Sanz M, Palència L, et al. Foreclosure and health in Southern Europe: results from the Platform for People Affected by Mortgages. J Urban Health. 2016;93:312-30.

A13. Córdoba-Doña JA, Escolar-Pujolar A, San Sebastián M, et al. How are the employed and unemployed affected by the economic crisis in Spain? Educational inequalities, life conditions and mental health in a context of high unemployment. BMC Public Health. 2016;16:1.

A14. Sarriá E, Recio P, Rico A, et al. Financial fraud, mental health, and quality of life: a study on the population of the city of Madrid, Spain. Int J Environ Res Public Health. 2019;16:E3276.

A15. Navarro-Mateu F, Tormo MJ, Salmerón D, et al. Prevalence of mental disorders in the South-East of Spain, one of the European Regions most affected by the economic crisis: the cross-sectional PEGASUS-Murcia Project. PLoS One. 2015;10:e0137293.

A16. Ruiz-Pérez I, Bermúdez-Tamayo C, Rodríguez-Barranco M. Socio-economic factors linked with mental health during the recession: a multilevel analysis. Int J Equity Health. 2017;16:45.

A17. Agudelo-Suárez AA, Ronda E, Vázquez-Navarrete ML, et al. Impact of economic crisis on mental health of migrant workers: what happened with migrants who came to Spain to work? Int J Public Health. 2013;58:627-31.

A18. Robert G, Martínez JM, García AM, et al. From the boom to the crisis: changes in employment conditions of immigrants in Spain and their effects on mental health. Eur J Public Health. 2014;24:404-9.

A19. Gotsens M, Malmusi D, Villarroel N, et al. Health inequality between immigrants and natives in Spain: the loss of the healthy immigrant effect in times of economic crisis. Eur J Public Health. 2015;25:923-9.

A20. Rajmil L, Medina-Bustos A, Fernández de Sanmamed MJ, et al. Impact of the economic crisis on children’s health in Catalonia: a before-after approach. BMJ Open. 2013;3:e003286.

A21. Rajmil L, Siddiqi A, Taylor-Robinson D, et al. Understanding the impact of the economic crisis on child health: the case of Spain. Int J Equity Health. 2015;14:1-9.

A22. Arroyo-Borrell E, Renart G, Saurina C, et al. Influence maternal background has on children's mental health. Int J Equity Health. 2017;16:63.

A23. Aguilar-Palacio I, Carrera-Lasfuentes P, Rabanaque MJ. Youth unemployment and economic recession in Spain: influence on health and lifestyles in young people (16–24 years old). Int J Public Health. 2015;60:427-35.

A24. Otero-García L, Briones-Vozmediano E, Vives-Cases C, et al. A qualitative study on primary health care responses to intimate partner violence during the economic crisis in Spain. Eur J Public Health. 2018;28:1000-5.

A25. López-Bernal JA, Gasparrini A, Artundo CM, et al. The effect of the late 2000s financial crisis on suicides in Spain: an interrupted time-series analysis. Eur J Public Health. 2013;23:732-6.

A26. Librero J, Segura A, González López-Valcárcel, B. Suicides, hurricanes and economic crisis. Eur J Public Health. 2014;24:183.

A27. Fountoulakis KN, Kawohl W, Theodorakis PN, et al. Relationship of suicide rates to economic variables in Europe: 2000-2011. Br J Psychiatry. 2014;205:486-96.

A28. Saurina C, Marzo M, Sáez M. Inequalities in suicide mortality rates and the economic recession in the municipalities of Catalonia, Spain. Int J Equity Health. 2015;14:1-10.

A29. Borrell C, Marí-Dell’Olmo M, Gotsens M, et al. Socioeconomic inequalities in suicide mortality before and after the economic recession in Spain. BMC Public Health. 2017;17:772.

A30. Rivera B, Casal B, Currais L. Crisis, suicide and labour productivity losses in Spain. Eur J Health Econ. 2017;18:83-96.

A31. Álvarez-Gálvez J, Salinas-Pérez JA, Rodero-Cosano ML, et al. Methodological barriers to studying the association between the economic crisis and suicide in Spain. BMC Public Health. 2017;17:694.

A32. Miret M, Caballero FF, Huerta-Ramírez R, et al. Factors associated with suicidal ideation and attempts in Spain for different age groups. Prevalence before and after the onset of the economic crisis. J Affect Disord. 2014;163:1-9.

A33. Córdoba-Doña JA, San Sebastián M, Escolar-Pujolar A, et al. Economic crisis and suicidal behaviour: the role of unemployment, sex and age in Andalusia, Southern Spain. Int J Equity Health. 2014;13:55.

A34. Roca M, Gili M, García-Campayo J, et al. Economic crisis and mental health in Spain. Lancet. 2013;382:1977-8.

A35. Amnistía Internacional. La receta equivocada. El impacto de las medidas de austeridad en el derecho a la salud en España. 2018. Disponible en: https://www.amnesty.org/es/documents/eur41/8136/2018/es/

A36. Medel-Herrero A, Gómez-Beneyto M. Impacto de la crisis económica del 2008 en el número de jóvenes hospitalizados por patología psiquiátrica. Rev Psiquiatr Salud Ment. 2017;12:28-36

A37. Iglesias-García C, Saiz-Martínez P, García-Portilla MP, et al. Effects of the economic crisis on demand due to mental disorders in Asturias: data from the Asturias Cumulative Psychiatric Case Register (2000–2010). Actas Esp Psiquiatr. 2014;42:108-15.

A38. Sicras-Mainar A, Navarro-Artieda R. Use of antidepressants in the treatment of major depressive disorder in primary care during a period of economic crisis. Neuropsychiatr Dis Treat. 2015;12:29-40.

A39. Barceló MA, Coll-Negre M, Coll-de-Tuero G, et al. Effects of the financial crisis on psyhotropic drug consumption in a cohort from a semi-urban region in Catalonia, Spain. PloS One. 2016;11:e0148594.

A40. Fernández-García MA, Olry-de-Labry-Lima A, Ferrer-López I, et al. Analysis of changes in trends in the consumption rates of benzodiazepines and benzodiazepine-related drugs. J Pharm Policy Pract. 2018;11:1.

A41. Arroyo E, Cabrera A, Renart G, et al. Did psychotropic drug consumption increase during the 2008 financial crisis? A cross-sectional population-based study in Spain. BMJ Open. 2018;9:e021440.

A42. Pérez-Romero S, Gascón-Cánovas JJ, de la Cruz-Sánchez E, et al. Recesión económica (2006-2012) y cambios en el estado de salud de la población española. Salud Publica Mex. 2016;58:41-8.

A43. Reibling N, Beckfield J, Huijts T, et al. Depressed during the depression: has the economic crisis affected mental health inequalities in Europe? Findings from the European Social Survey (2014) special module on the determinants of health. Eur J Public Health. 2017;27(Suppl 1):47-54.

A44. Borrell C, Palència L, Marí Dell’Olmo M, et al. Socioeconomic inequalities in suicide mortality in European urban areas before and during the economic recession. Eur J Public Health. 2020;30:92-8.

A45. Zapata-Moya AR, Buel V, Navarro-Yáñez CJ, et al. Social inequality in morbidity, framed within the current economic crisis in Spain. Int J Equity Health. 2015;14:131.
